# Supplementary material
Source: Springer Nature journal article supplement (https://www.springerprofessional.de/resource/supplementary/40095_2012_16_MOESM1_ESM.pdf/11899648)

Petroleum Woodfuel Electricity

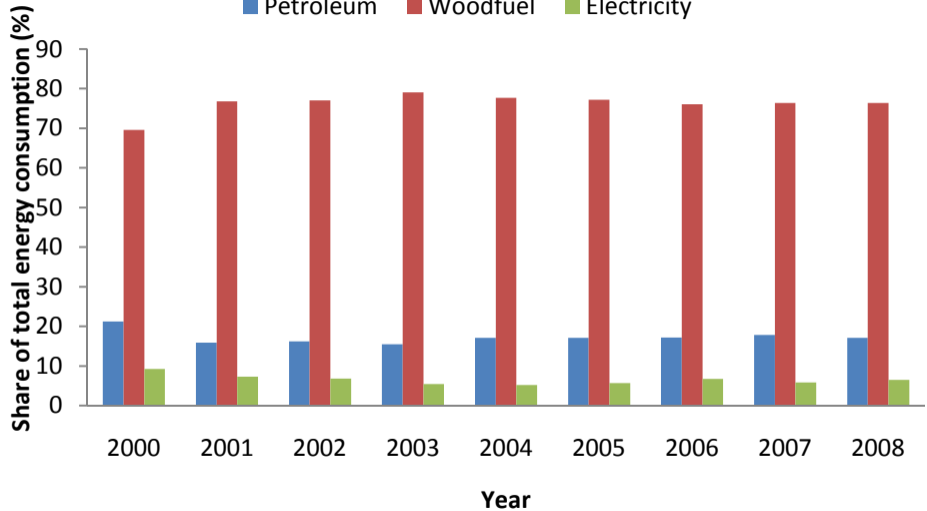

Supplement: MOESM1 [file 11899648]
